# Supplementary material for: Calcium-vesicles perform active diffusion in the sea urchin embryo during larval biomineralization
Source: PubMed Central journal article supplement (PMC7932551; doi:10.1371/journal.pcbi.1008780), 2021-02-22
Supplement: pcbi.1008780.s002.pdf [file pcbi.1008780.s002.pdf]

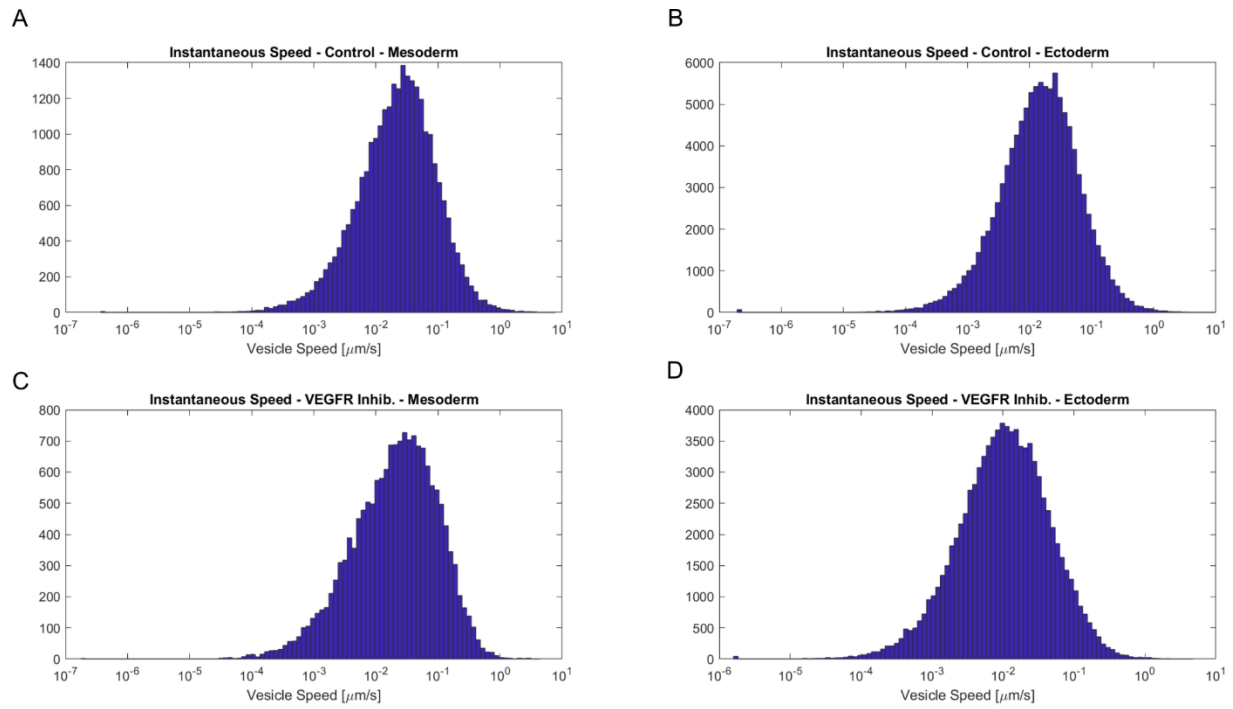

**Supplementary Figure 2 Vesicle instantaneous speed histograms.** Histograms of vesicle instantaneous speed for every track in control (A, B) and VEGFR inhibition (C, D) are shown. For each histogram there is a single peak, making it unlikely that there are multiple different motion types (*e.g.* progressive movement vs. vesicle pausing observed in motor-guided movement).
