# Supplementary material for: Calcium-vesicles perform active diffusion in the sea urchin embryo during larval biomineralization
Source: PubMed Central journal article supplement (PMC7932551; doi:10.1371/journal.pcbi.1008780), 2021-02-22
Supplement: pcbi.1008780.s004.pdf [file pcbi.1008780.s004.pdf]

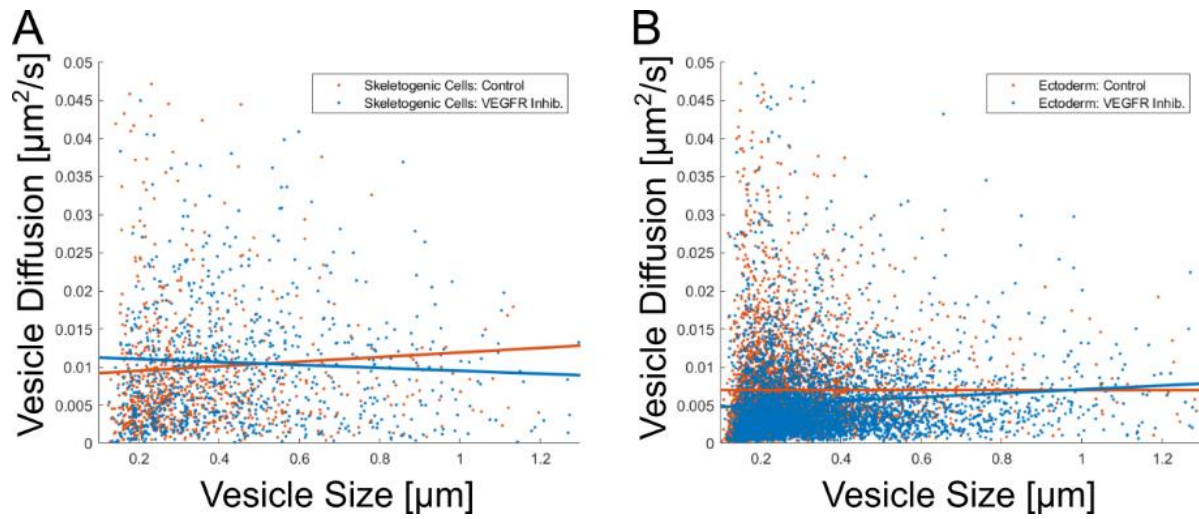

**Supplementary Figure 4 Vesicle diffusion coefficient vs. size scatter plot comparison.** These images show vesicle diffusion rate relative to average vesicle size for each vesicle tracked, in both skeletogenic mesodermal (A) and ectodermal (B) regions. A linear regression fit is shown for each region, orange for control and blue for VEGFR inhibition. In both regions the Pearson's  $R^2 < 0.007$ , indicating that there is practically no correlation between vesicle size and diffusion rate.
