# Supplementary material for: Calcium-vesicles perform active diffusion in the sea urchin embryo during larval biomineralization
Source: PLOS journal article supplement (doi:10.1371/journal.pcbi.1008780), 2021-02-22
Supplement: S1 (10.1371/journal.pcbi.1008780.s001) [file journal.pcbi.1008780.s001]

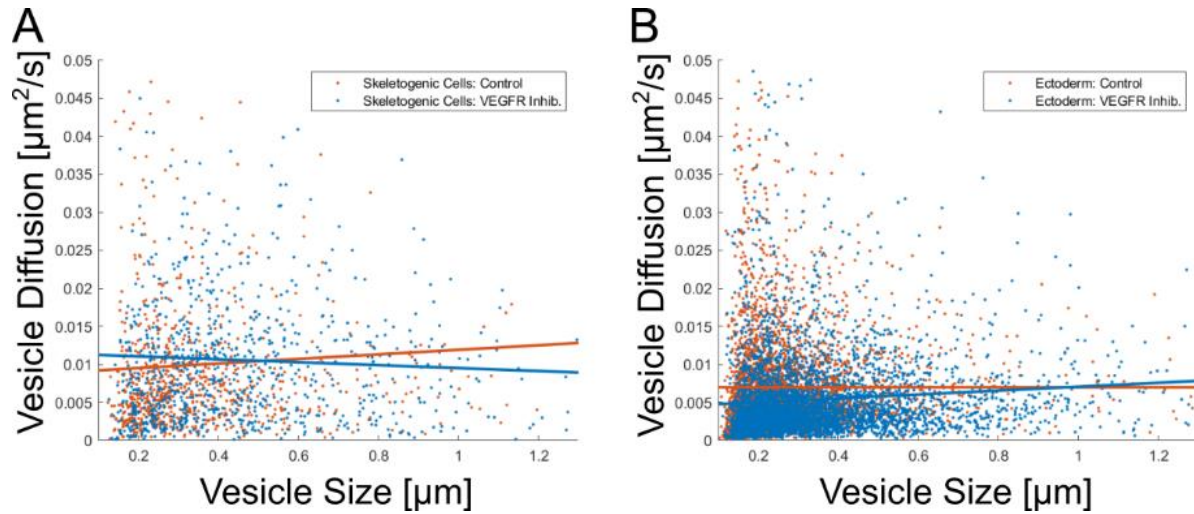

**Supplementary Figure 1 Vesicle instantaneous speed vs. size scatter plot comparison.** These images show average vesicle speed and size for each vesicle tracked, in both skeletogenic mesodermal (A) and ectodermal (B) regions. A trendline fit is shown for each region, in orange for control and in blue for VEGFR inhibition. In both regions and in all experimental condition Pearson's  $R^2 < 0.013$ , showing no correlation between vesicle size and velocity.
